# Supplementary material
Source: publisher figshare collection journal article supplement (https://acs.figshare.com/ndownloader/files/3835771)
Supplement: Supplementary file 1 [file 3835771]

50
(PCN)Pd(OH) --- 9a
 C     1.082263    16.701691     4.033148
 H     0.539359    16.117777     4.767346
 C     1.241282    18.090294     3.889756
 H     0.837737    18.873224     4.517610
 C     2.029976    18.246859     2.768226
 H     2.406990    19.136767     2.280281
 C     3.102279    15.164817     1.015099
 C     3.066482    16.556242     1.177694
 C     3.860355    14.643859    -0.041592
 C     3.723702    17.425501     0.316159
 H     3.681646    18.505554     0.454937
 C     4.519853    15.505293    -0.923318
 H     5.103295    15.098087    -1.750626
 C     4.445340    16.884126    -0.745832
 H     4.962364    17.549257    -1.435127
 C     3.971860    13.145156    -0.139222
 H     4.959539    12.815782     0.216511
 H     3.877287    12.763065    -1.166868
 C     3.576961    10.980287     1.902775
 C     2.563075    10.159856     2.698205
 H     1.924726     9.540876     2.053177
 H     1.931040    10.810134     3.320812
 H     3.103199     9.476400     3.371023
 C     4.506713    11.678964     2.900756
 H     3.937413    12.281600     3.620754
 H     5.241089    12.335194     2.412519
 H     5.069187    10.913900     3.457856
 C     4.397795    10.079701     0.984085
 H     4.944568     9.347374     1.597877
 H     5.147878    10.638340     0.407561
 H     3.779066     9.514024     0.278101
 C     1.302525    11.793414    -0.165693
 C     0.065198    11.435087     0.656760
 H    -0.756924    11.171220    -0.026257
 H    -0.263568    12.284892     1.270714
 H     0.230230    10.575571     1.318089
 C     1.707829    10.613352    -1.043196
 H     0.923986    10.437001    -1.795957
 H     1.814130     9.686225    -0.465543
 H     2.646719    10.790544    -1.587068
 C     0.948061    12.990680    -1.052262
 H     1.761406    13.273310    -1.733396
 H     0.683452    13.873473    -0.454835
 H     0.077255    12.725040    -1.670577
 N     1.732092    16.064821     3.069934
 N     2.311470    17.011652     2.292102
 P     2.679908    12.386662     1.001674
Pd     2.037249    14.106286     2.328848
 O     0.957183    13.229765     3.815923
 H     0.441381    12.481749     3.490390

   50
(PCCH)Pd(OH) --- 9a'
 C     0.620998    17.963448     3.132842
 H    -0.205614    18.658504     3.230123
 C     1.089799    17.023728     4.066440
 H     0.728954    16.824134     5.066823
 C     2.161684    16.423159     3.436201
 H     2.949010    15.779683     3.835938
 C     3.263202    15.140610     1.090874
 C     3.070025    16.523088     1.132242
 C     4.018603    14.620031     0.026524
 C     3.571844    17.384290     0.163728
 H     3.367092    18.451017     0.229445
 C     4.534307    15.469265    -0.953838
 H     5.110670    15.056623    -1.783445
 C     4.308288    16.842891    -0.884634
 H     4.709508    17.497492    -1.656299
 C     4.200634    13.127507    -0.014439
 H     5.151476    12.828344     0.451838
 H     4.200913    12.707862    -1.031849
 C     3.537719    10.878088     1.899136
 C     2.411630    10.107421     2.585225
 H     1.736244     9.624597     1.865599
 H     1.838011    10.773378     3.248192
 H     2.856143     9.308539     3.198355
 C     4.480080    11.413946     2.982082
 H     3.929167    11.992722     3.734635
 H     5.284063    12.043956     2.574697
 H     4.956632    10.558728     3.485068
 C     4.318157     9.983060     0.938265
 H     4.769956     9.161213     1.514219
 H     5.139762    10.514713     0.438789
 H     3.684992     9.528171     0.168133
 C     1.382496    12.039824    -0.130882
 C     0.103485    11.930468     0.699582
 H    -0.741986    11.715510     0.028278
 H    -0.104688    12.872612     1.224053
 H     0.150415    11.135421     1.452481
 C     1.600067    10.766368    -0.944642
 H     0.782480    10.669396    -1.674979
 H     1.587366     9.862180    -0.322557
 H     2.541403    10.786460    -1.511800
 C     1.237317    13.225216    -1.087355
 H     2.083404    13.319067    -1.781004
 H     1.124031    14.178389    -0.555331
 H     0.332558    13.069016    -1.693928
 N     1.329580    17.944641     2.005040
 N     2.271729    17.015065     2.203257
 P     2.830048    12.406406     1.039492
Pd     2.332586    14.026794     2.493381
 O     1.524077    12.946191     4.016267
 H     0.580558    13.158443     4.054752

   50
TSrot
 C     3.309179    -1.957939    -0.710611
 H     3.483229    -2.663339    -1.516947
 C     2.678181    -2.208029     0.550019
 H     2.328401    -3.147048     0.960812
 C     2.753073    -0.991966     1.194565
 H     2.471484    -0.700522     2.200914
 C     1.290602     0.960845    -0.082214
 C     2.648420     1.145906     0.222151
 C     0.537283     2.109221    -0.371597
 C     3.262023     2.386750     0.242126
 H     4.325231     2.466167     0.461628
 C     1.138254     3.372079    -0.343096
 H     0.542701     4.257672    -0.572269
 C     2.486075     3.512996    -0.028336
 H     2.938564     4.502815    -0.008175
 C    -0.905959     1.919989    -0.747843
 H    -1.023362     1.921644    -1.841980
 H    -1.572352     2.706631    -0.362667
 C    -2.507001    -0.502243    -1.513032
 C    -3.227338    -1.743706    -0.990625
 H    -4.047729    -1.483505    -0.307440
 H    -2.527452    -2.416910    -0.472372
 H    -3.674148    -2.279295    -1.842537
 C    -1.541066    -0.921680    -2.625039
 H    -0.862268    -1.715060    -2.286928
 H    -0.926125    -0.088033    -2.993613
 H    -2.124196    -1.304850    -3.476322
 C    -3.507824     0.507762    -2.074035
 H    -4.068177     0.027096    -2.890389
 H    -3.021819     1.397368    -2.497340
 H    -4.240675     0.841025    -1.329908
 C    -2.335797     0.511745     1.488882
 C    -2.554081    -0.822440     2.204265
 H    -2.926730    -0.617153     3.219637
 H    -1.629577    -1.409288     2.275781
 H    -3.294734    -1.453358     1.699890
 C    -3.667379     1.229328     1.284490
 H    -4.090759     1.485967     2.267521
 H    -4.401379     0.595197     0.770842
 H    -3.563107     2.166348     0.718544
 C    -1.416013     1.379143     2.352930
 H    -1.231316     2.373431     1.924650
 H    -0.443493     0.896543     2.519852
 H    -1.894071     1.524257     3.333236
 N     3.670456    -0.708718    -0.845417
 N     3.391469    -0.089019     0.356966
 P    -1.420038     0.225561    -0.145525
Pd     0.509894    -0.904245     0.203930
 O    -0.459494    -2.680080     0.584727
 H    -0.018700    -3.344806     0.036429

   50
TS1
 C     1.007550    18.246375     3.349233
 H     0.560381    19.194167     3.630284
 C     0.783780    16.969419     3.903876
 H     0.137397    16.703548     4.732097
 C     1.617481    16.108670     3.213443
 H     1.606512    14.962276     3.858183
 C     3.145022    15.096334     0.984528
 C     3.063983    16.475594     1.205760
 C     3.936178    14.597803    -0.052844
 C     3.729008    17.367610     0.372374
 H     3.633383    18.436106     0.548994
 C     4.602932    15.492443    -0.895516
 H     5.219454    15.116372    -1.713032
 C     4.488499    16.862874    -0.680957
 H     5.008537    17.555907    -1.340323
 C     4.072717    13.104271    -0.163183
 H     5.055643    12.781824     0.211604
 H     3.994187    12.722612    -1.192151
 C     3.602433    10.900812     1.839068
 C     2.551785    10.081546     2.585163
 H     1.911492     9.502294     1.905967
 H     1.917848    10.715746     3.221385
 H     3.062067     9.361046     3.242044
 C     4.537290    11.541365     2.870584
 H     3.976371    12.125269     3.613140
 H     5.285786    12.203556     2.412523
 H     5.081861    10.745166     3.400606
 C     4.407656    10.010787     0.896065
 H     4.908191     9.226637     1.484437
 H     5.192852    10.565668     0.365727
 H     3.782225     9.508447     0.149273
 C     1.329396    11.852926    -0.168909
 C     0.090483    11.614405     0.695821
 H    -0.765889    11.386624     0.043039
 H    -0.161314    12.507023     1.285034
 H     0.211873    10.774504     1.390036
 C     1.627206    10.617495    -1.012575
 H     0.802481    10.462372    -1.724794
 H     1.703980     9.707265    -0.403696
 H     2.549800    10.720127    -1.600963
 C     1.049384    13.044621    -1.087905
 H     1.869581    13.243701    -1.790141
 H     0.861088    13.965087    -0.519468
 H     0.151261    12.823567    -1.683896
 N     1.887028    18.207070     2.363028
 N     2.266418    16.914996     2.289673
 P     2.769802    12.356161     0.960061
Pd     2.155178    14.062721     2.337179
 O     1.314122    13.613732     4.266494
 H     0.351534    13.535972     4.189503

   50
(PCC)Pd(H2O) --- 11a
 C     4.744920    -1.439918     0.200892
 H     5.751801    -1.834858     0.297698
 C     3.520901    -2.155458     0.167361
 H     3.398431    -3.232700     0.233813
 C     2.531720    -1.193908     0.029129
 H     0.691868    -3.422470    -0.607148
 C     1.130765     1.000863    -0.233817
 C     2.519522     1.187371    -0.147368
 C     0.300823     2.105885    -0.417806
 C     3.092681     2.447544    -0.210387
 H     4.173204     2.551164    -0.135892
 C     0.873029     3.385880    -0.474620
 H     0.229571     4.256484    -0.611236
 C     2.249096     3.548179    -0.368467
 H     2.679077     4.547602    -0.416096
 C    -1.179401     1.901102    -0.598887
 H    -1.443207     1.983801    -1.663839
 H    -1.783396     2.658122    -0.075846
 C    -2.931732    -0.401682    -1.312034
 C    -3.603764    -1.678505    -0.812810
 H    -4.295222    -1.484900     0.018034
 H    -2.866733    -2.427938    -0.487233
 H    -4.193500    -2.123372    -1.629064
 C    -2.134059    -0.739301    -2.575818
 H    -1.416892    -1.551541    -2.392371
 H    -1.567757     0.119742    -2.962640
 H    -2.825958    -1.064616    -3.367981
 C    -3.985346     0.650892    -1.648165
 H    -4.660637     0.252225    -2.421506
 H    -3.543896     1.572206    -2.051174
 H    -4.604470     0.922528    -0.785289
 C    -2.338385     0.379009     1.693020
 C    -2.452243    -0.999501     2.345189
 H    -2.752877    -0.881001     3.397682
 H    -1.487849    -1.527244     2.329127
 H    -3.197847    -1.640751     1.859689
 C    -3.684444     1.093356     1.738780
 H    -3.955467     1.292312     2.787334
 H    -4.491914     0.488321     1.305606
 H    -3.662307     2.062620     1.220521
 C    -1.307530     1.192277     2.481481
 H    -1.205873     2.221610     2.113506
 H    -0.312252     0.728461     2.456230
 H    -1.630533     1.247429     3.532310
 N     4.567305    -0.130061     0.096489
 N     3.227122    -0.009204    -0.003870
 P    -1.624696     0.165248    -0.055790
Pd     0.507930    -0.881201    -0.056941
 O     0.094431    -3.133113     0.101435
 H     0.584518    -3.321472     0.918028

  100
(PCC)Pd(m-OH)Pd(PCN) H2O ---- 10a_H2O
 C    -1.258787     1.742169     1.583361
 C    -0.177859     2.340450     2.212782
 H     0.815246     1.919970     2.348934
 C    -0.635321     3.618652     2.620850
 H    -0.086807     4.393623     3.148732
 C    -3.593076     1.104649     0.585341
 C    -3.524313     2.384990     1.161476
 C    -4.812015     0.664758     0.063938
 C    -4.620102     3.232521     1.209490
 H    -4.522177     4.216116     1.664919
 C    -5.927116     1.516542     0.102173
 H    -6.880916     1.176473    -0.305595
 C    -5.825483     2.782666     0.667076
 H    -6.698830     3.433319     0.691440
 C    -4.916968    -0.740045    -0.474980
 H    -5.503438    -0.800391    -1.404504
 H    -5.437060    -1.383482     0.250353
 C    -3.296397    -3.196462     0.012282
 C    -1.998803    -3.947153    -0.282388
 H    -2.009559    -4.914441     0.243141
 H    -1.120008    -3.392588     0.083725
 H    -1.865790    -4.157098    -1.353132
 C    -3.404503    -3.011728     1.530421
 H    -4.294576    -2.437770     1.823997
 H    -2.525442    -2.504584     1.953516
 H    -3.484972    -4.002683     2.004408
 C    -4.489949    -4.010074    -0.483208
 H    -4.424904    -4.255512    -1.549288
 H    -5.445574    -3.496397    -0.311697
 H    -4.532074    -4.961310     0.070077
 C    -2.869935    -1.422294    -2.572655
 C    -1.363464    -1.574618    -2.797839
 H    -0.983889    -2.549114    -2.458901
 H    -0.801336    -0.783443    -2.277731
 H    -1.143217    -1.494724    -3.874048
 C    -3.279608    -0.032958    -3.067592
 H    -2.955979     0.085589    -4.113220
 H    -2.812453     0.765655    -2.475637
 H    -4.365681     0.122838    -3.039157
 C    -3.626489    -2.482883    -3.363242
 H    -3.485773    -2.306601    -4.441510
 H    -4.707380    -2.458811    -3.165288
 H    -3.261312    -3.496644    -3.150664
 C    -0.232794     2.605495    -1.352946
 H    -1.141857     2.088605    -1.053669
 C    -0.060805     3.853437    -1.972222
 H    -0.831650     4.538258    -2.297869
 C     1.302786     4.028500    -2.053857
 H     1.893568     4.847317    -2.444124
 C     3.455061     1.388520    -0.608884
 C     3.240351     2.592686    -1.291741
 C     4.773060     1.011328    -0.322909
 C     4.290635     3.399267    -1.713236
 H     4.108885     4.330469    -2.247995
 C     5.837214     1.812240    -0.747316
 H     6.862787     1.513350    -0.527108
 C     5.594027     2.994028    -1.438721
 H     6.426729     3.613981    -1.765197
 C     4.988550    -0.238723     0.481282
 H     5.197038     0.017619     1.530572
 H     5.840083    -0.844009     0.135229
 C     3.241592    -1.944581     2.217198
 C     2.151293    -3.015189     2.251921
 H     2.471269    -3.946580     1.764959
 H     1.217009    -2.667182     1.793526
 H     1.914678    -3.250793     3.299525
 C     2.822516    -0.774802     3.113564
 H     1.812838    -0.418950     2.875739
 H     3.519937     0.074120     3.056755
 H     2.804693    -1.119747     4.158056
 C     4.561560    -2.524293     2.726837
 H     4.402940    -2.904075     3.747407
 H     5.358753    -1.771273     2.786314
 H     4.926033    -3.362810     2.121733
 C     3.604655    -2.529407    -0.880270
 C     2.242569    -3.143578    -1.207107
 H     2.366452    -3.891915    -2.005015
 H     1.545111    -2.377949    -1.577773
 H     1.784048    -3.648754    -0.347568
 C     4.596267    -3.622279    -0.495643
 H     4.776887    -4.268270    -1.368447
 H     4.219249    -4.263825     0.310983
 H     5.569151    -3.213853    -0.187861
 C     4.112040    -1.804800    -2.129098
 H     5.119818    -1.389537    -1.997477
 H     3.444707    -0.984502    -2.425696
 H     4.157874    -2.524420    -2.960497
 N    -1.904243     3.834074     2.293255
 N    -2.255750     2.687329     1.670958
 N     0.944602     2.055547    -1.080413
 N     1.886802     2.932062    -1.514681
 P    -3.186710    -1.434636    -0.693877
 P     3.386870    -1.212779     0.476103
Pd    -1.864659     0.105792     0.502875
Pd     1.831624     0.340900    -0.149572
 O     0.112881    -0.799045     0.398685
 H     0.064896    -1.571889    -0.178458
 O    -0.549691    -1.361500     3.070730
 H    -1.099522    -0.589318     3.271006
 H    -0.289034    -1.189584     2.140765
